# Supplementary material for: Combination therapy of gefitinib and miR-30a-5p may overcome acquired drug resistance through regulating the PI3K/AKT pathway in non-small cell lung cancer
Source: PubMed Central journal article supplement — Ther Adv Respir Dis. 2020 Jun 18;14:1753466620915156. doi: 10.1177/1753466620915156 (PMC7303773; doi:10.1177/1753466620915156), 2020-06-18
Supplement: Supplementary_materials.pdf [file Supplementary_materials.pdf]

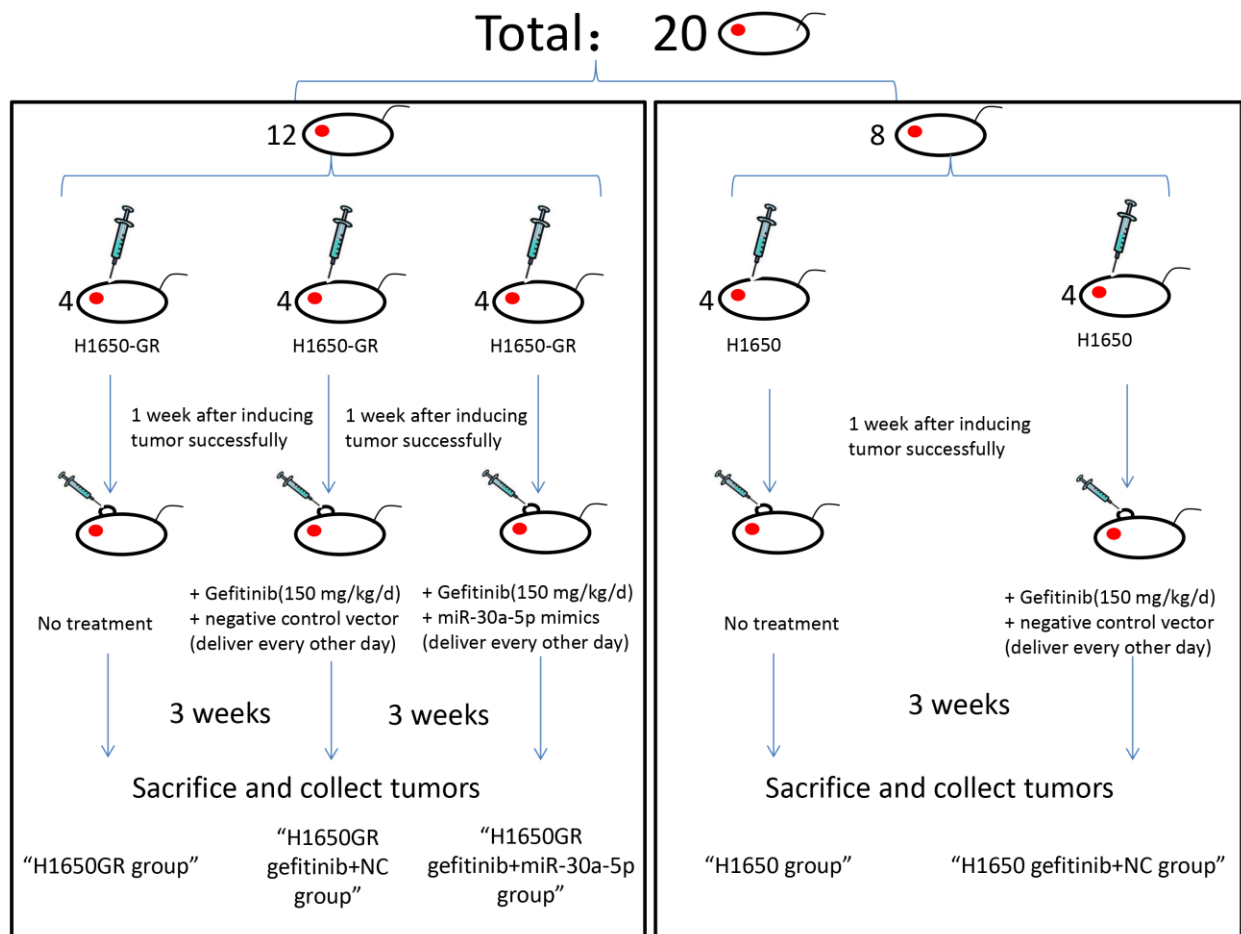

**Figure S1.** The flow chart illustration for the design of animal study.

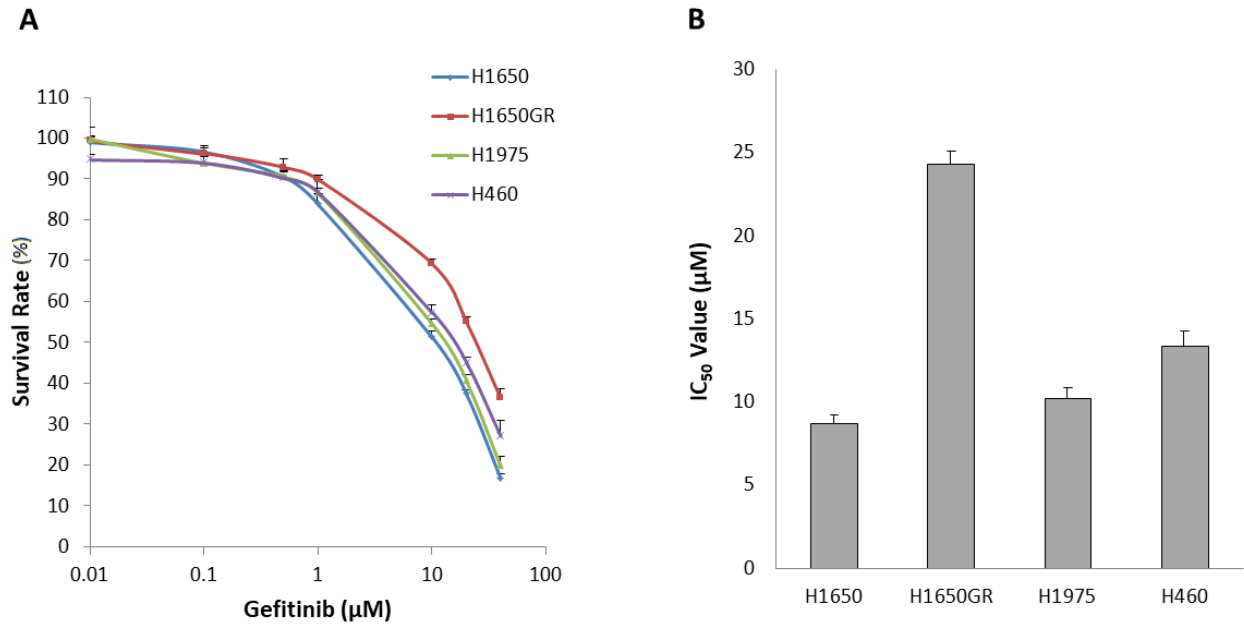

**Figure S2.** The cytotoxic effects of gefitinib in H1650, H1650GR, H1975 and H460 cell lines. (A) Cell survival rate under different concentrations of gefitinib. (B) Detected IC<sub>50</sub> values in the four cell lines.

**Table S1.** The summary for the activation status of EGFR, IGF1R and MET signaling pathways in the H1650, H1650GR, H1975 and H460 cell lines.

| Cell line | IC <sub>50</sub> gefitinib ( $\mu\text{M}$ ) | Gefitinib effects |             | Gene status       |            |           | TKR status of activation with gefitinib |            |            |
|-----------|----------------------------------------------|-------------------|-------------|-------------------|------------|-----------|-----------------------------------------|------------|------------|
|           |                                              | p-AKT             | p-Erk       | EGFR              | PI3KCA     | K-ras     | EGFR                                    | IGF1R      | Met        |
| H1650     | 8.7                                          | Blocked           | Blocked     | Mut(DelE746-A750) | Wt         | Wt        | Blocked                                 | Not active | Not active |
| H1650GR   | 24.4                                         | Active            | Blocked     | Mut(DelE746-A750) | Wt         | Wt        | Blocked                                 | Active     | Not active |
| H1975     | 10.2                                         | Active            | Active      | Mut(L858R+T790M)  | Mut(G118D) | Wt        | Active                                  | Active     | Not active |
| H460      | 13.4                                         | Active            | Less active | Wt                | Mut(E545K) | Mut(Q61H) | Blocked                                 | Not active | Active     |
